# Supplementary material for: Functional analysis of a zebrafish myd88 mutant identifies key transcriptional components of the innate immune system
Source: PubMed Central journal article supplement — Dis Model Mech. 2013 Feb 21;6(3):841–54. doi: 10.1242/dmm.010843 (PMC3634667; doi:10.1242/dmm.010843), 2013-02-21
Supplement: supp_010843_DMM010843.pdf [file supp_010843_DMM010843.pdf]

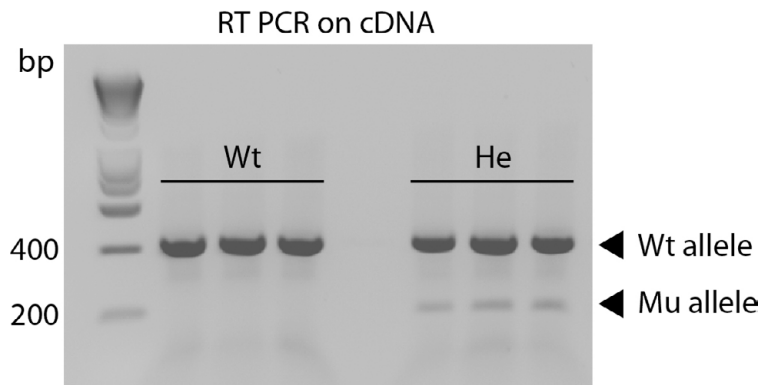

**Fig. S1. Mutant transcript stability is lower than wild type transcript stability.** To compare the stability of the wild type transcript with that of the mutant transcript, RT PCR was performed on three biological replicates of wild type and heterozygous *myd88* mutants ( $n=20$  embryos of 3 dpf per group). The PCR product was digested using *MseI*, which specifically cuts the mutant transcript (at bp 200 out of 400). The 400 bp wild type transcript and the two 200 bp halves of the mutant transcript were separated by gel electrophoresis, demonstrating that the mutant transcript was less abundant than the wild type transcript.

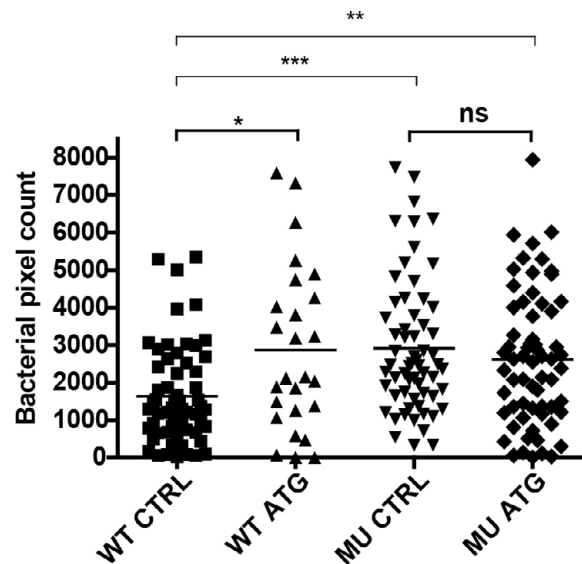

**Fig. S2. AUG-morpholino targeting *myd88* does not increase bacterial burdens in *myd88* mutants.** At 28 hpf, *myd88*<sup>-/-</sup> (Mu) and wild type (Wt) embryos injected with either an AUG-morpholino targeting the *myd88* transcript or a 5' mismatch control morpholino were infected with approximately 200 cfu of mCherry-labeled *M. marinum* strain Mma 20 by injection into the blood island and stereo fluorescence images of infected embryos were taken at 3 dpi. Bacterial pixel counts were determined based on stereo fluorescence images. Significant differences (\*\*\*)  $P < 0.001$ ; \*\*  $P < 0.01$ ; \*  $P < 0.05$ ) were determined by one-way ANOVA with Tukey's multiple comparison method as a post-hoc test.

**Table S1. Primers used for qPCR analysis of gene expression**

| <b>Gene</b>     | <b>Accession #</b> | <b>Forward qPCR primer</b>      | <b>Reverse qPCR primer</b>      |
|-----------------|--------------------|---------------------------------|---------------------------------|
| <i>ppial</i>    | AY391451           | 5'-ACACTGAAACACGGAGGCAAAG-3'    | 5'-CATCCACAACCTCCCGAACAC-3'     |
| <i>il1b</i>     | NM_212844          | 5'-GAACAGAATGAAGCACATCAAACC-3'  | 5'-ACGGCACTGAATCCACCAC-3'       |
| <i>tnfa</i>     | NM_212859          | 5'-AGACCTTAGACTGGAGAGATGAC-3'   | 5'-CAAAGACACCTGGCTGGCTGTAGAC-3' |
| <i>il8</i>      | EH458432           | 5'-TGTGTTATTGTTTTCTGGCATTTC-3'  | 5'-GCGACAGCGTGGATCTACAG-3'      |
| <i>cxcl-c1c</i> | NM_001115060       | 5'-TCTTCTGCTGCTGCTTGCGGT-3'     | 5'-GGTGTCCCTGCGAGCACGAT-3'      |
| <i>mmp9</i>     | NM_213123          | 5'-CATTAAAGATGCCCTGATGTATCCC-3' | 5'-AGTGGTGGTCCGTGGTTGAG-3'      |
| <i>ifnphi1</i>  | NM_207640          | 5'-TTAATACACGCAAAGATGAGAACTC-3' | 5'-GCCAAGCCATTCGCAAGTAG-3'      |
